# Supplementary material for: FGFR3 gene mutation plus GRB10 gene duplication in a patient with achondroplasia plus growth delay with prenatal onset
Source: Orphanet J Rare Dis. 2016 Jul 2;11:89. doi: 10.1186/s13023-016-0465-4 (PMC4930580; doi:10.1186/s13023-016-0465-4)
Supplement: Additional file 1: — Supplemental Tables S1, S2 and S3. (XLSX 16 kb) [file 13023_2016_465_MOESM1_ESM.xlsx]

## Sheet: S1
	Realtime PCR Primer sequences
GRB10	F：5' TCAGCCTAGATGACGGGAAC'3
	R：5'GAGAGGACATCTGCGGTCAT'3
ACTB	F：5' TCGTGCGTGACATTAAGGAG '3
	R：5' GTCAGGCAGCTCGTAGCTCT '3

## Sheet: S 2
RT-PCR	mRNA Primer sequences
GRB10	F：5' TGGATGACAGCGTTCAGACT'3
	R：5'GAGGGAGTTCTCGGAGACAC'3
GAPDH	F：5' TGAGAACGGGAAGCTTGTCA'3
	R：5'GGACTCCACGACGTACTCAG'3

## Sheet: S3
FGFR3 Primer sequences
FGFR3-X1	F：5'GCCTTCCTCCTCCTGTAGTCT'3	exon 1
FGFR3-X1	R：5'AGCGGAATCCGGGCTCTAA'3
FGFR3-X2&3	F：5'GGTCAGAGCCTTCCTCACT'3	exon 2,3
FGFR3-X2&3	R：5'GCATCTAGAGCCATGTCAGT'3
FGFR3-X4&5&6	F：5'CATCCCGCCCTCTTCCTACACA'3	exon 4,5,6
FGFR3-X4&5&6	R：5'CCAACCCCTAGACCCAAATCC'3
FGFR3-X7	F：5'GCTCACCTGGGACAGAGGACT'3	exon 7
FGFR3-X7	R：5'GGCCGTAAGTCACAGGATTCC'3
FGFR3-X8	F：5'ACTGCGAGACCCTCCAGACAA'3	exon 8
FGFR3-X8	R：5'CTGAGGACAGCCTTGCGATG'3
FGFR3-X9	F：5'TCCTCGTCTCTGCTCACCAT'3	exon 9
FGFR3-X9	R：5'GCAAACTCGCCCACTCTCA'3
FGFR3-X10&11&12	F：5'CTGAGAGTGGGCGAGTTTG'3	exon 10,11,12
FGFR3-X10&11&12	R：5'CTGAAGCCTCTCCACCTCT'3
FGFR3-X13&14	F：5'AACCTGCGGGAGTTTCTGC'3	exon 13,14
FGFR3-X13&14	R：5'GAAGGTGAGGTCAGGCTGTC'3
FGFR3-X15&16	F：5'GCTCCTGGGTGTGGTTTCTA'3	exon 15,16
FGFR3-X15&16	R：5'CGACAGGTCCAGGTACTCCT'3
FGFR3-X17	F：5'AGAGGTGGCTGTGCGAAGA'3	exon 17
FGFR3-X17	R：5'CAGGGTGGGAAGTGGGAAAG'3
